# Supplementary material for: Constraint-Based Local Search for Inventory Control Under Stochastic Demand and Lead Time
Source: Atypon-hosted journal article supplement (doi:10.1287/ijoc.1100.0434), 2011-02-03
Supplement: ijoc.1100.0434-sm-ec.pdf [file ijoc.1100.0434-sm-ec.pdf]

# Online Supplement to: “Constraint-based Local Search for Inventory Control under Stochastic Demand and Lead time”

Roberto Rossi

Logistics, Decision and Information Sciences, Wageningen UR, the Netherlands, roberto.rossi@wur.nl

S. Armagan Tarim

Department of Management, Hacettepe University, Turkey, armtar@yahoo.com

Ramesh Bollapragada

Decision Sciences Department, College of Business, San Francisco State University, 1600 Holloway Avenue, San Francisco, California, USA, rameshb@sfsu.edu

The work “Constraint-based Local Search for Inventory Control under Stochastic Demand and Lead time” addresses the general multi-period production/inventory problem with non-stationary stochastic demand and supplier lead time under service-level constraints. Two hybrid algorithms that blend Constraint Programming and Local Search for computing near-optimal policy parameters are proposed. This document presents tabular data for the extensive computational results conducted in our research in order to compare both the heuristic techniques with each other and with an existing exact approach available in the literature.

*Key words:* inventory control; demand uncertainty; supplier lead-time uncertainty; constraint-based local search; heuristics.

*History:* submitted in February 2010. Revised in May 2010. Accepted in Aug 2010.

---

## 1. Experimental results

In this section we provide a full overview on the results of our computational experience (Section 7 of the article).

The results obtained by running the exact approach in Rossi et al. [1] over the test bed discussed in the article are shown in Table 1 and Table 2. In Table 3, we compare the cost of the solutions found by the two heuristics to the optimal ones. In Table 4, we present the run-times for the two heuristics.

It might be argued that the exact approach in Rossi et al. [1] may converge quickly to good solutions and therefore be used as a heuristic approach by simply limiting the run time and collecting the best solution found within the given time limit. Since the maximum run

time observed for our heuristic methods over the given test bed is 8.5 seconds, we allocated a run time of 10 seconds to the exact approach and observed the cost difference between the optimal solution produced by the exact approach without a time limit and the best solution that this approach could find in the given time limit of 10 seconds. In Table 5 we present the observed cost differences, in percentage of optimal costs.

In order to assess the scalability of the two heuristics, we now run tests over a 15-period planning horizon. In addition, we also consider all the 5 possible discrete probability density functions for the lead time originally presented in the article, and we vary the remaining model parameters. By doing so, we obtain a total of 240 instances. In Table 6 and Table 7 we compare, respectively, the run times and the cost of the solutions found by the two heuristics for this new set of instances. Since these instances are intractable for the exact approach, we will only compare the two heuristics among each other.

## References

- [1] Rossi, R., S. A. Tarim, B. Hnich, S. Prestwich. 2010. Computing the non-stationary replenishment cycle inventory policy under stochastic supplier lead-times. *International Journal of Production Economics* **127** 180–189.

|     |    | $a = 100$       |                 |                 |                 | $a = 175$       |                 |                 |                 | $a = 250$       |                 |                 |                 |
|-----|----|-----------------|-----------------|-----------------|-----------------|-----------------|-----------------|-----------------|-----------------|-----------------|-----------------|-----------------|-----------------|
|     |    | $c_v = 0.2$     |                 | $c_v = 0.3$     |                 | $c_v = 0.2$     |                 | $c_v = 0.3$     |                 | $c_v = 0.2$     |                 | $c_v = 0.3$     |                 |
| Set | LT | $\alpha = 0.85$ | $\alpha = 0.95$ |
| 1   | 1  | 620             | 682             | 640             | 728             | 770             | 833             | 797             | 893             | 920             | 983             | 947             | 1043            |
|     | 2  | 677             | 764             | 686             | 826             | 834             | 914             | 836             | 976             | 970             | 1042            | 986             | 1126            |
|     | 3  | 703             | 820             | 738             | 869             | 853             | 967             | 888             | 1020            | 970             | 1042            | 1030            | 1138            |
| 2   | 1  | 715             | 783             | 745             | 847             | 895             | 973             | 937             | 1051            | 1045            | 1123            | 1087            | 1201            |
|     | 2  | 803             | 961             | 838             | 1028            | 1028            | 1131            | 1057            | 1215            | 1187            | 1281            | 1207            | 1365            |
|     | 3  | 903             | 1025            | 953             | 1103            | 1057            | 1243            | 1105            | 1317            | 1207            | 1383            | 1255            | 1467            |
| 3   | 1  | 772             | 854             | 798             | 924             | 966             | 1052            | 1016            | 1148            | 1116            | 1202            | 1166            | 1298            |
|     | 2  | 836             | 1032            | 886             | 1098            | 1061            | 1182            | 1100            | 1280            | 1214            | 1332            | 1250            | 1430            |
|     | 3  | 889             | 1087            | 950             | 1162            | 1065            | 1278            | 1137            | 1362            | 1215            | 1378            | 1287            | 1504            |
| 4   | 1  | 530             | 590             | 560             | 650             | 680             | 740             | 710             | 800             | 808             | 886             | 860             | 950             |
|     | 2  | 576             | 662             | 588             | 716             | 726             | 811             | 738             | 866             | 808             | 886             | 874             | 994             |
|     | 3  | 545             | 678             | 600             | 734             | 695             | 811             | 750             | 884             | 808             | 886             | 874             | 994             |

Table 1: Exact approach, optimal policy costs, 6-period planning horizon.

3

|     |    | $a = 100$       |                 |                 |                 | $a = 175$       |                 |                 |                 | $a = 250$       |                 |                 |                 |
|-----|----|-----------------|-----------------|-----------------|-----------------|-----------------|-----------------|-----------------|-----------------|-----------------|-----------------|-----------------|-----------------|
|     |    | $c_v = 0.2$     |                 | $c_v = 0.3$     |                 | $c_v = 0.2$     |                 | $c_v = 0.3$     |                 | $c_v = 0.2$     |                 | $c_v = 0.3$     |                 |
| Set | LT | $\alpha = 0.85$ | $\alpha = 0.95$ |
| 1   | 1  | 20              | 46              | 15              | 47              | 0.98            | 2.5             | 0.86            | 3.7             | 0.39            | 0.72            | 0.52            | 1.2             |
|     | 2  | 210             | 582             | 142             | 793             | 4.4             | 16              | 3.2             | 24              | 0.66            | 1.9             | 0.80            | 4.5             |
|     | 3  | 3188            | 15570           | 4258            | 18496           | 27              | 243             | 35              | 318             | 0.66            | 2.8             | 2.0             | 19              |
| 2   | 1  | 210             | 583             | 212             | 934             | 7.2             | 20              | 9.4             | 37              | 1.1             | 2.9             | 1.4             | 4.8             |
|     | 2  | 1611            | 14409           | 1993            | 23781           | 150             | 521             | 148             | 935             | 16              | 43              | 13              | 76              |
|     | 3  | 46082           | 88934           | 62789           | 132963          | 794             | 16092           | 1224            | 24845           | 49              | 537             | 82              | 943             |
| 3   | 1  | 571             | 1800            | 436             | 2413            | 28              | 69              | 39              | 153             | 3.3             | 8.3             | 4.3             | 16              |
|     | 2  | 1866            | 16488           | 2486            | 20712           | 340             | 1176            | 379             | 2016            | 17              | 115             | 14              | 234             |
|     | 3  | 70805           | 216835          | 104318          | 380934          | 2630            | 49724           | 6767            | 79378           | 110             | 1261            | 208             | 5472            |
| 4   | 1  | 3.6             | 6.1             | 3.1             | 9.5             | 0.42            | 1.2             | 0.69            | 1.9             | 0.19            | 0.53            | 0.44            | 1.1             |
|     | 2  | 52              | 211             | 32              | 292             | 1.4             | 12              | 1.2             | 15              | 0.19            | 0.53            | 0.49            | 1.4             |
|     | 3  | 90              | 2684            | 304             | 4139            | 2.0             | 40              | 7.7             | 90              | 0.20            | 0.53            | 0.47            | 1.4             |

Table 2: Exact approach, run times (secs), 6-period planning horizon.

|     |    | $a = 100$       |      |                 |      |                 |      |                 |      | $a = 175$       |      |                 |      |                 |      |                 |      | $a = 250$       |      |                 |      |                 |      |                 |      |
|-----|----|-----------------|------|-----------------|------|-----------------|------|-----------------|------|-----------------|------|-----------------|------|-----------------|------|-----------------|------|-----------------|------|-----------------|------|-----------------|------|-----------------|------|
|     |    | $c_v = 0.2$     |      |                 |      | $c_v = 0.3$     |      |                 |      | $c_v = 0.2$     |      |                 |      | $c_v = 0.3$     |      |                 |      | $c_v = 0.2$     |      |                 |      | $c_v = 0.3$     |      |                 |      |
|     |    | $\alpha = 0.85$ |      | $\alpha = 0.95$ |      | $\alpha = 0.85$ |      | $\alpha = 0.95$ |      | $\alpha = 0.85$ |      | $\alpha = 0.95$ |      | $\alpha = 0.85$ |      | $\alpha = 0.95$ |      | $\alpha = 0.85$ |      | $\alpha = 0.95$ |      | $\alpha = 0.85$ |      | $\alpha = 0.95$ |      |
| Set | LT | H1              | H2   |
| 1   | 1  | 3.4             | 0.48 | 0.44            | 0    | 3.1             | 0.63 | 1.4             | 0.55 | 3.4             | 0.39 | 0.12            | 0.36 | 4.6             | 0.38 | 0.11            | 0.67 | 2.7             | 0.33 | 0.10            | 0.31 | 4               | 0.32 | 0               | 0.58 |
|     | 2  | 5.0             | 0.44 | 0.52            | 0.79 | 5.4             | 0.87 | 0.85            | 0.97 | 3.2             | 0.48 | 0.44            | 0.66 | 4.4             | 0.72 | 0.82            | 0.82 | 4.2             | 0    | 0.19            | 0    | 4               | 0.61 | 0               | 0.71 |
|     | 3  | 22              | 0    | 0.12            | 3.3  | 8.0             | 0.54 | 0.12            | 4.1  | 5.0             | 0    | 0.21            | 0    | 4.6             | 0.45 | 0.10            | 4.2  | 7.6             | 0    | 0.19            | 0    | 5               | 0    | 0.09            | 0    |
| 2   | 1  | 4.2             | 0.56 | 0.77            | 0.51 | 6.7             | 0.27 | 2.7             | 0.71 | 4.9             | 0.67 | 0.31            | 0.31 | 7.5             | 0.64 | 0.10            | 0.29 | 4.2             | 0.57 | 0.27            | 0.27 | 6               | 0.55 | 0.08            | 0.25 |
|     | 2  | 14              | 0.50 | 1.2             | 0.94 | 14              | 1.1  | 1.6             | 0.58 | 5.6             | 0.39 | 0.27            | 0.18 | 6.0             | 0.85 | 0.25            | 0.49 | 4.1             | 0.17 | 0.23            | 0.16 | 5               | 0.75 | 0.22            | 0.44 |
|     | 3  | 2.3             | 0    | 6.9             | 0.68 | 4.0             | 0.10 | 7.7             | 1.1  | 13              | 0    | 0.16            | 0.80 | 7.1             | 0    | 0               | 1.2  | 4.8             | 0    | 0.14            | 0    | 6               | 0    | 0.07            | 1.1  |
| 3   | 1  | 2.8             | 0.78 | 0.35            | 0.70 | 3.9             | 0.75 | 0.22            | 0.65 | 5.1             | 0.62 | 1.2             | 0.57 | 3.6             | 0.30 | 0.26            | 0.52 | 4.4             | 0.54 | 0.17            | 0.50 | 5               | 0.26 | 0.23            | 0.46 |
|     | 2  | 15              | 2.0  | 0.29            | 0.78 | 8.9             | 2.6  | 2.3             | 0.82 | 6.4             | 1.0  | 0.25            | 0.68 | 4.7             | 0.91 | 0.47            | 0.31 | 5.4             | 0.66 | 0.23            | 0.60 | 4               | 0.80 | 0.28            | 0.28 |
|     | 3  | 13              | 4.3  | 4.0             | 6.0  | 10              | 2.4  | 4.5             | 6.3  | 8.8             | 3.5  | 0.16            | 1.9  | 8.9             | 0    | 0.22            | 1.8  | 7.8             | 3.0  | 0.15            | 0    | 7               | 0    | 0.07            | 0    |
| 4   | 1  | 5.7             | 0.38 | 0.34            | 1.0  | 9.3             | 1.1  | 1.2             | 1.2  | 4.4             | 0.29 | 0.27            | 0.81 | 6.6             | 0.85 | 0.12            | 1.0  | 6.4             | 0    | 0.56            | 0    | 5               | 0.70 | 0.11            | 0.84 |
|     | 2  | 5.2             | 0.69 | 0.76            | 1.2  | 9.4             | 1.0  | 0.42            | 1.1  | 4.1             | 0.55 | 0.49            | 0    | 6.1             | 0.81 | 0.35            | 0.92 | 10              | 0    | 0.45            | 0    | 7               | 0    | 0.10            | 0    |
|     | 3  | 21              | 0    | 1.2             | 8.6  | 9.5             | 0    | 0.82            | 8.2  | 10              | 0    | 0.37            | 0    | 10              | 0    | 0.68            | 4.0  | 10              | 0    | 0.34            | 0    | 12              | 0    | 0.10            | 0    |

Table 3: Additional cost, in % of the cost of the optimal policy, incurred if Heuristic I (H1) or Heuristic II (H2) are used, 6-period planning horizon.

4

|     |    | $a = 100$       |      |                 |      |                 |      |                 |      | $a = 175$       |      |                 |      |                 |      |                 |      | $a = 250$       |      |                 |      |                 |      |                 |      |
|-----|----|-----------------|------|-----------------|------|-----------------|------|-----------------|------|-----------------|------|-----------------|------|-----------------|------|-----------------|------|-----------------|------|-----------------|------|-----------------|------|-----------------|------|
|     |    | $c_v = 0.2$     |      |                 |      | $c_v = 0.3$     |      |                 |      | $c_v = 0.2$     |      |                 |      | $c_v = 0.3$     |      |                 |      | $c_v = 0.2$     |      |                 |      | $c_v = 0.3$     |      |                 |      |
|     |    | $\alpha = 0.85$ |      | $\alpha = 0.95$ |      | $\alpha = 0.85$ |      | $\alpha = 0.95$ |      | $\alpha = 0.85$ |      | $\alpha = 0.95$ |      | $\alpha = 0.85$ |      | $\alpha = 0.95$ |      | $\alpha = 0.85$ |      | $\alpha = 0.95$ |      | $\alpha = 0.85$ |      | $\alpha = 0.95$ |      |
| Set | LT | H1              | H2   |
| 1   | 1  | 3.5             | 0.72 | 2.4             | 0.16 | 1.2             | 0.14 | 2.8             | 0.16 | 1.2             | 0.11 | 1.7             | 0.13 | 0.88            | 0.34 | 1.8             | 0.20 | 1.3             | 0.39 | 1.2             | 0.36 | 0.91            | 0.69 | 1.4             | 0.14 |
|     | 2  | 3.9             | 0.72 | 3.5             | 0.33 | 3.0             | 0.56 | 5.2             | 0.41 | 1.8             | 0.19 | 2.4             | 0.27 | 2.3             | 0.45 | 1.5             | 0.27 | 1.6             | 0.30 | 1.8             | 0.70 | 2.0             | 1.0  | 1.8             | 0.67 |
|     | 3  | 3.4             | 0.36 | 4.4             | 1.3  | 3.5             | 1.2  | 2.2             | 1.1  | 2.3             | 0.27 | 2.2             | 1.8  | 2.8             | 0.49 | 2.1             | 1.27 | 1.5             | 0.70 | 1.4             | 0.69 | 1.3             | 0.77 | 1.2             | 1.5  |
| 2   | 1  | 2.8             | 0.45 | 3.2             | 0.17 | 2.4             | 0.20 | 3.2             | 0.20 | 1.8             | 0.17 | 2.4             | 0.55 | 2.4             | 0.17 | 2.6             | 0.20 | 1.8             | 0.52 | 2.1             | 0.44 | 2.0             | 0.16 | 2.5             | 0.50 |
|     | 2  | 3.8             | 0.89 | 2.9             | 0.66 | 4.7             | 0.77 | 3.2             | 1.5  | 3.5             | 0.70 | 3.4             | 0.95 | 3.6             | 0.38 | 3.4             | 1.1  | 2.2             | 0.83 | 2.2             | 0.94 | 2.3             | 0.39 | 2.6             | 1.0  |
|     | 3  | 3.3             | 0.83 | 3.7             | 2.0  | 4.4             | 1.4  | 4.3             | 1.7  | 3.1             | 1.5  | 2.7             | 2.5  | 3.8             | 1.5  | 3.4             | 1.6  | 3.0             | 0.97 | 2.0             | 0.88 | 2.7             | 1.5  | 3.1             | 1.3  |
| 3   | 1  | 2.7             | 0.53 | 3.8             | 0.78 | 2.4             | 0.16 | 4.4             | 0.20 | 3.4             | 1.2  | 3.7             | 0.58 | 1.5             | 0.55 | 3.6             | 0.70 | 2.3             | 0.41 | 2.0             | 0.31 | 2.4             | 0.47 | 4.6             | 0.34 |
|     | 2  | 4.3             | 0.80 | 6.4             | 1.7  | 3.2             | 0.88 | 5.7             | 1.0  | 3.8             | 1.1  | 4.3             | 0.67 | 2.9             | 0.78 | 3.9             | 1.2  | 4.1             | 0.69 | 2.5             | 0.91 | 3.0             | 0.61 | 4.1             | 0.94 |
|     | 3  | 7.7             | 1.1  | 5.5             | 2.4  | 6.3             | 1.4  | 5.5             | 3.4  | 4.0             | 2.6  | 4.5             | 1.6  | 4.8             | 1.4  | 3.5             | 1.1  | 3.7             | 1.2  | 2.1             | 1.3  | 4.0             | 0.36 | 5.6             | 1.3  |
| 4   | 1  | 2.5             | 0.33 | 2.6             | 0.39 | 2.8             | 0.33 | 3.0             | 0.38 | 2.4             | 0.16 | 2.1             | 0.31 | 1.3             | 0.23 | 2.7             | 0.39 | 1.3             | 0.31 | 1.4             | 0.34 | 0.7             | 0.09 | 1.7             | 0.30 |
|     | 2  | 3.2             | 0.59 | 4.0             | 0.74 | 3.9             | 0.70 | 3.0             | 0.58 | 2.7             | 0.16 | 2.9             | 0.50 | 1.7             | 0.72 | 3.9             | 0.70 | 2.0             | 0.50 | 2.1             | 0.55 | 2.1             | 0.36 | 2.3             | 0.17 |
|     | 3  | 3.8             | 0.49 | 8.5             | 0.61 | 3.2             | 0.63 | 4.8             | 2.3  | 2.6             | 0.16 | 2.7             | 1.1  | 4.0             | 0.55 | 2.9             | 1.2  | 1.4             | 0.16 | 1.3             | 0.78 | 1.8             | 0.45 | 3.3             | 0.47 |

Table 4: Heuristic I (H1) and Heuristic II (H2) run times (secs), 6-period planning horizon.

|     |    | $a = 100$       |                 |                 |                 | $a = 175$       |                 |                 |                 | $a = 250$       |                 |                 |                 |
|-----|----|-----------------|-----------------|-----------------|-----------------|-----------------|-----------------|-----------------|-----------------|-----------------|-----------------|-----------------|-----------------|
|     |    | $c_v = 0.2$     |                 | $c_v = 0.3$     |                 | $c_v = 0.2$     |                 | $c_v = 0.3$     |                 | $c_v = 0.2$     |                 | $c_v = 0.3$     |                 |
| Set | LT | $\alpha = 0.85$ | $\alpha = 0.95$ |
| 1   | 1  | 0               | 0               | 0               | 2.0             | 0               | 0               | 0               | 0               | 0               | 0               | 0               | 0               |
|     | 2  | 1               | 2.3             | 0               | 0.85            | 0               | 0               | 0               | 0               | 0               | 0               | 0               | 0               |
|     | 3  | 12              | 8.7             | 6.7             | 10              | 0.59            | 0               | 0               | 4.2             | 0               | 0               | 0               | 0               |
| 2   | 1  | 4.2             | 5.1             | 5.6             | 6.3             | 0               | 0               | 0               | 0               | 0               | 0               | 0               | 0               |
|     | 2  | 42              | 28              | 45              | 31              | 1.3             | 15              | 22              | 17              | 0               | 2.4             | 0               | 1.6             |
|     | 3  | 26              | 20              | 28              | 22              | 15              | 5.2             | 17              | 8.4             | 7.1             | 0               | 9.2             | 2.4             |
| 3   | 1  | 5.7             | 7               | 8.5             | 8               | 0               | 1.1             | 0               | 0               | 0               | 0               | 0               | 0               |
|     | 2  | 12              | 17              | 7               | 17              | 2.8             | 3.9             | 0               | 11              | 0               | 3.4             | 0               | 1.6             |
|     | 3  | 25              | 12              | 24              | 14              | 12              | 1.9             | 12              | 4.9             | 2.5             | 0               | 5.6             | 0               |
| 4   | 1  | 0               | 0               | 0               | 0               | 0               | 0               | 0               | 0               | 0               | 0               | 0               | 0               |
|     | 2  | 0               | 0               | 0               | 2.9             | 0               | 0               | 0               | 0               | 0               | 0               | 0               | 0               |
|     | 3  | 11              | 0               | 5               | 4.5             | 0               | 0               | 0               | 0               | 0               | 0               | 0               | 0               |

Table 5: Exact approach with a run time limited to 10 seconds. Additional cost, in % of the cost of the optimal policy.

|     |    | $a = 100$       |    |                 |      |                 |    |                 |      | $a = 175$       |    |                 |      |                 |     |                 |      | $a = 250$       |     |                 |      |                 |     |                 |      |   |
|-----|----|-----------------|----|-----------------|------|-----------------|----|-----------------|------|-----------------|----|-----------------|------|-----------------|-----|-----------------|------|-----------------|-----|-----------------|------|-----------------|-----|-----------------|------|---|
|     |    | $c_v = 0.2$     |    |                 |      | $c_v = 0.3$     |    |                 |      | $c_v = 0.2$     |    |                 |      | $c_v = 0.3$     |     |                 |      | $c_v = 0.2$     |     |                 |      | $c_v = 0.3$     |     |                 |      |   |
|     |    | $\alpha = 0.85$ |    | $\alpha = 0.95$ |      | $\alpha = 0.85$ |    | $\alpha = 0.95$ |      | $\alpha = 0.85$ |    | $\alpha = 0.95$ |      | $\alpha = 0.85$ |     | $\alpha = 0.95$ |      | $\alpha = 0.85$ |     | $\alpha = 0.95$ |      | $\alpha = 0.85$ |     | $\alpha = 0.95$ |      |   |
| Set | LT | H1              | H2 | H1              | H2   | H1              | H2 | H1              | H2   | H1              | H2 | H1              | H2   | H1              | H2  | H1              | H2   | H1              | H2  | H1              | H2   | H1              | H2  | H1              | H2   |   |
| 1   | 1  | 1.5             | 0  | 0.5             | 0    | 1.7             | 0  | 0               | 0.21 | 0.68            | 0  | 0               | 0.45 | 1.2             | 0   | 0               | 0.59 | 1.4             | 0   | 0               | 0.50 | 1.7             | 0   | 0               | 0.54 |   |
|     | 2  | 2.0             | 0  | 0               | 0.18 | 1.1             | 0  | 0.04            | 0    | 1.3             | 0  | 0               | 0.84 | 1.5             | 0   | 0               | 0.91 | 1.5             | 0   | 0               | 0.37 | 2.2             | 0   | 0               | 0.85 |   |
|     | 3  | 1.6             | 0  | 1.4             | 0    | 2.7             | 0  | 0               | 0.12 | 1.5             | 0  | 0               | 0    | 0.76            | 0   | 0               | 0.71 | 2.2             | 0   | 0               | 0.93 | 1.4             | 0   | 0               | 0.97 |   |
|     | 4  | 9.8             | 0  | 3.4             | 0    | 11              | 0  | 2.6             | 0    | 0               | 11 | 0               | 1.0  | 0               | 5.0 | 0               | 2.3  | 0               | 2.6 | 0               | 1.3  | 0               | 1.6 | 0               | 0.33 | 0 |
|     | 5  | 18              | 0  | 6.1             | 0    | 5.1             | 0  | 2.1             | 0    | 0               | 16 | 0               | 2.4  | 0               | 9.9 | 0               | 0    | 0.94            | 8.9 | 0               | 1.3  | 0               | 9.6 | 0               | 0.53 | 0 |
| 2   | 1  | 0.9             | 0  | 0               | 0.04 | 1.6             | 0  | 0               | 0    | 1.3             | 0  | 0               | 0.43 | 0.82            | 0   | 0               | 0.5  | 0.88            | 0   | 0               | 0.09 | 1.1             | 0   | 0               | 0.49 |   |
|     | 2  | 6.2             | 0  | 0.5             | 0    | 4.0             | 0  | 0.9             | 0    | 3               | 0  | 0               | 0.48 | 2.4             | 0   | 0               | 0    | 3.0             | 0   | 0               | 0.55 | 0.77            | 0   | 0               | 0.58 |   |
|     | 3  | 5.4             | 0  | 4.3             | 0    | 1.0             | 0  | 1.1             | 0    | 1.0             | 0  | 2.5             | 0    | 2.0             | 0   | 0.65            | 0    | 1.9             | 0   | 2.1             | 0    | 1.5             | 0   | 0.44            | 0    |   |
|     | 4  | 2.9             | 0  | 5.7             | 0    | 1.7             | 0  | 2.5             | 0    | 3.5             | 0  | 2.9             | 0    | 3.2             | 0   | 3.5             | 0    | 2.5             | 0   | 2.6             | 0    | 3.0             | 0   | 2.88            | 0    |   |
|     | 5  | 9.4             | 0  | 6.9             | 0    | 1.1             | 0  | 0               | 3.3  | 14              | 0  | 0               | 0.29 | 0.09            | 0   | 0               | 0.19 | 8.1             | 0   | 1.6             | 0    | 3.7             | 0   | 0               | 0.84 |   |
| 3   | 1  | 3.0             | 0  | 0               | 0.44 | 4.0             | 0  | 0               | 0    | 2.4             | 0  | 0               | 0    | 4.8             | 0   | 0.25            | 0    | 4.5             | 0   | 0               | 0.51 | 5.3             | 0   | 0               | 0.73 |   |
|     | 2  | 8.6             | 0  | 0.5             | 0    | 5.5             | 0  | 0.42            | 0    | 6.0             | 0  | 0               | 0.54 | 2.4             | 0   | 0               | 0    | 3.6             | 0   | 0               | 0.48 | 4.3             | 0   | 0.32            | 0    |   |
|     | 3  | 8.1             | 0  | 0               | 1.4  | 8.5             | 0  | 0               | 0    | 6.2             | 0  | 0.45            | 0    | 6.1             | 0   | 0               | 3.5  | 5.2             | 0   | 1.7             | 0    | 5.9             | 0   | 0               | 3.4  |   |
|     | 4  | 15              | 0  | 3.3             | 0    | 11              | 0  | 0               | 0    | 6.0             | 0  | 2.4             | 0    | 9.6             | 0   | 0               | 0.32 | 5.3             | 0   | 2.2             | 0    | 9.5             | 0   | 0               | 0.27 |   |
|     | 5  | 6.4             | 0  | 0.8             | 0    | 1.8             | 0  | 0               | 0    | 14              | 0  | 1.6             | 0    | 4.3             | 0   | 0               | 2.8  | 7.5             | 0   | 1.5             | 0    | 4.1             | 0   | 0               | 1.4  |   |
| 4   | 1  | 2.7             | 0  | 0.0             | 0.65 | 3.5             | 0  | 0               | 0.82 | 0.82            | 0  | 0               | 0.47 | 2.1             | 0   | 0               | 0.71 | 2.4             | 0   | 0               | 0.20 | 3.0             | 0   | 0               | 0.61 |   |
|     | 2  | 2.2             | 0  | 1.9             | 0    | 3.7             | 0  | 0.55            | 0    | 2.6             | 0  | 0               | 0.70 | 3.1             | 0   | 0               | 0.86 | 2.3             | 0   | 0               | 0.44 | 2.7             | 0   | 0               | 0.81 |   |
|     | 3  | 2.2             | 0  | 0.3             | 0    | 3.7             | 0  | 1.7             | 0    | 2.9             | 0  | 0               | 1.3  | 3.7             | 0   | 0               | 0.65 | 3.2             | 0   | 0               | 0.88 | 3.8             | 0   | 0               | 0.58 |   |
|     | 4  | 14              | 0  | 7.0             | 0    | 8.0             | 0  | 3.9             | 0    | 5.0             | 0  | 6.2             | 0    | 1.5             | 0   | 5.3             | 0    | 5.5             | 0   | 3.0             | 0    | 3.1             | 0   | 2.85            | 0    |   |
|     | 5  | 8.7             | 0  | 4.6             | 0    | 11              | 0  | 3.0             | 0    | 5.6             | 0  | 3.2             | 0    | 6.1             | 0   | 0.64            | 0    | 1.2             | 0   | 0               | 0.03 | 2.8             | 0   | 0               | 0.03 |   |

Table 6: Cost comparison between Heuristic I (H1) and Heuristic II (H2). A value of 0 is associated with the heuristic that has found the best solution, the other value denotes the cost difference — in percentage of the best solution — achieved by the other heuristic, 15-period planning horizon.

|     |    | a = 100         |      |                 |      |                 |      |                 |      | a = 175         |      |                 |      |                 |      |                 |      | a = 250         |      |                 |      |                 |      |                 |      |
|-----|----|-----------------|------|-----------------|------|-----------------|------|-----------------|------|-----------------|------|-----------------|------|-----------------|------|-----------------|------|-----------------|------|-----------------|------|-----------------|------|-----------------|------|
|     |    | $c_v = 0.2$     |      |                 |      | $c_v = 0.3$     |      |                 |      | $c_v = 0.2$     |      |                 |      | $c_v = 0.3$     |      |                 |      | $c_v = 0.2$     |      |                 |      | $c_v = 0.3$     |      |                 |      |
|     |    | $\alpha = 0.85$ |      | $\alpha = 0.95$ |      | $\alpha = 0.85$ |      | $\alpha = 0.95$ |      | $\alpha = 0.85$ |      | $\alpha = 0.95$ |      | $\alpha = 0.85$ |      | $\alpha = 0.95$ |      | $\alpha = 0.85$ |      | $\alpha = 0.95$ |      | $\alpha = 0.85$ |      | $\alpha = 0.95$ |      |
| Set | LT | H1              | H2   |
| 1   | 1  | 24              | 161  | 17              | 224  | 18              | 195  | 15              | 218  | 12              | 150  | 16              | 196  | 10              | 127  | 18              | 194  | 21              | 69   | 21              | 102  | 14              | 60   | 21              | 104  |
|     | 2  | 26              | 446  | 33              | 420  | 14              | 311  | 28              | 404  | 23              | 327  | 30              | 421  | 12              | 275  | 27              | 405  | 28              | 210  | 36              | 360  | 19              | 153  | 30              | 355  |
|     | 3  | 26              | 602  | 33              | 763  | 24              | 568  | 43              | 741  | 29              | 588  | 36              | 762  | 19              | 560  | 36              | 742  | 40              | 437  | 49              | 730  | 28              | 397  | 46              | 702  |
|     | 4  | 36              | 1096 | 53              | 1294 | 46              | 1088 | 51              | 1516 | 39              | 1098 | 43              | 1296 | 19              | 1089 | 41              | 1439 | 43              | 979  | 56              | 1291 | 38              | 935  | 46              | 1431 |
|     | 5  | 48              | 1874 | 48              | 2178 | 37              | 1902 | 66              | 2391 | 30              | 1870 | 42              | 2190 | 31              | 1909 | 47              | 2391 | 54              | 1646 | 50              | 2191 | 50              | 1678 | 44              | 2402 |
| 2   | 1  | 11              | 295  | 16              | 328  | 14              | 281  | 15              | 327  | 17              | 299  | 15              | 331  | 10              | 282  | 16              | 330  | 12              | 255  | 23              | 311  | 12              | 231  | 21              | 310  |
|     | 2  | 25              | 520  | 29              | 669  | 18              | 472  | 28              | 648  | 25              | 524  | 35              | 674  | 18              | 480  | 29              | 653  | 24              | 523  | 29              | 673  | 16              | 473  | 37              | 651  |
|     | 3  | 28              | 959  | 35              | 1345 | 24              | 924  | 51              | 1219 | 23              | 961  | 35              | 1272 | 25              | 930  | 35              | 1220 | 26              | 961  | 40              | 1272 | 25              | 925  | 53              | 1217 |
|     | 4  | 32              | 1837 | 99              | 2105 | 35              | 1826 | 27              | 2443 | 36              | 1836 | 59              | 2099 | 32              | 1825 | 38              | 2449 | 31              | 1843 | 71              | 2103 | 36              | 1825 | 84              | 2447 |
|     | 5  | 37              | 3129 | 48              | 3470 | 46              | 3223 | 36              | 4206 | 38              | 3122 | 46              | 3479 | 38              | 3207 | 73              | 4221 | 30              | 3123 | 66              | 3475 | 33              | 3213 | 67              | 4267 |
| 3   | 1  | 21              | 196  | 21              | 218  | 18              | 189  | 21              | 220  | 13              | 120  | 21              | 172  | 12              | 122  | 19              | 194  | 12              | 43   | 18              | 80   | 6               | 50   | 17              | 110  |
|     | 2  | 35              | 359  | 32              | 442  | 27              | 342  | 39              | 440  | 28              | 323  | 26              | 438  | 19              | 318  | 25              | 439  | 20              | 178  | 24              | 308  | 17              | 165  | 22              | 357  |
|     | 3  | 33              | 629  | 33              | 793  | 36              | 605  | 38              | 811  | 25              | 587  | 34              | 792  | 25              | 576  | 26              | 809  | 22              | 360  | 30              | 689  | 22              | 366  | 24              | 761  |
|     | 4  | 36              | 1219 | 42              | 1303 | 32              | 1202 | 29              | 1549 | 24              | 1207 | 30              | 1304 | 32              | 1190 | 31              | 1551 | 21              | 883  | 20              | 1283 | 27              | 853  | 28              | 1519 |
|     | 5  | 30              | 1800 | 31              | 2076 | 30              | 1915 | 34              | 2422 | 26              | 1794 | 20              | 2070 | 28              | 1906 | 23              | 2421 | 19              | 1559 | 17              | 2044 | 22              | 1697 | 19              | 2418 |
| 4   | 1  | 11              | 200  | 12              | 219  | 9               | 182  | 12              | 217  | 12              | 98   | 22              | 141  | 9               | 75   | 17              | 137  | 15              | 39   | 17              | 64   | 4               | 29   | 16              | 61   |
|     | 2  | 18              | 343  | 22              | 400  | 17              | 322  | 27              | 387  | 26              | 313  | 29              | 401  | 21              | 283  | 26              | 385  | 20              | 153  | 24              | 276  | 18              | 128  | 22              | 270  |
|     | 3  | 13              | 547  | 27              | 722  | 21              | 530  | 39              | 706  | 19              | 515  | 29              | 721  | 26              | 493  | 30              | 705  | 21              | 290  | 29              | 616  | 21              | 278  | 27              | 605  |
|     | 4  | 65              | 1018 | 153             | 1347 | 23              | 992  | 65              | 1353 | 30              | 1016 | 46              | 1345 | 32              | 1045 | 48              | 1351 | 33              | 784  | 35              | 1289 | 25              | 706  | 39              | 1288 |
|     | 5  | 25              | 1709 | 40              | 2067 | 22              | 1720 | 52              | 2126 | 139             | 1702 | 46              | 2069 | 47              | 1717 | 37              | 2124 | 28              | 1465 | 41              | 2055 | 36              | 1471 | 53              | 2121 |

Table 7: Heuristic I (H1) and Heuristic II (H2) run times (secs), 15-period planning horizon.
